# Supplementary material for: Emissive and photothermal poly( N -isopropylacrylamide)-immobilized carbon-nanodots with thermoresponsive drug release properties
Source: Royal Society of Chemistry journal article supplement (doi:10.1039/d5tb01844g), 2025-01-01
Supplement: d5tb01844g1.pdf [file d5tb01844g1.pdf]

## Emissive and Photothermal PNP-*immobilized-carbon-nanodots* with Thermoresponsive Drug Release Property

Salvatore Petralia<sup>1,2,3\*</sup>, Grazia M.L. Consoli<sup>2,3</sup>, Ludovica Maugeri<sup>1</sup>, Nicolò Musso<sup>4</sup>, Corinna Lombardo<sup>1</sup>, Giuseppe Consiglio<sup>5</sup>, Silvia Scalese<sup>6</sup> and Giuseppe Forte<sup>1\*</sup>

<sup>1</sup> Department of Drug and Health Sciences, University of Catania, Via Santa Sofia 64, 95125, Catania, Italy

<sup>2</sup> Consiglio Nazionale delle Ricerche-Istituto di Chimica Biomolecolare, Via Paolo Gaifami 18, 95126 Catania, Italy. E-mail: salvatore.petralia@unict.it

<sup>3</sup> CIB-Interuniversity Consortium for Biotechnologies U.O. of Catania, Via Flavia, 23/1, 34148 Trieste, Italy

<sup>4</sup> Faculty of Medicine and Surgery, "Kore" University of Enna, Contrada Santa Panasia, 94100 Enna, Italy

<sup>5</sup> Department of Chemical Science, University of Catania, Via Santa Sofia 64, 95125, Catania, Italy

<sup>6</sup> Consiglio Nazionale delle Ricerche-Istituto per la Microelettronica e Microsistemi (CNR-IMM), Ottava Strada n.5, I-95121, Catania, Italy

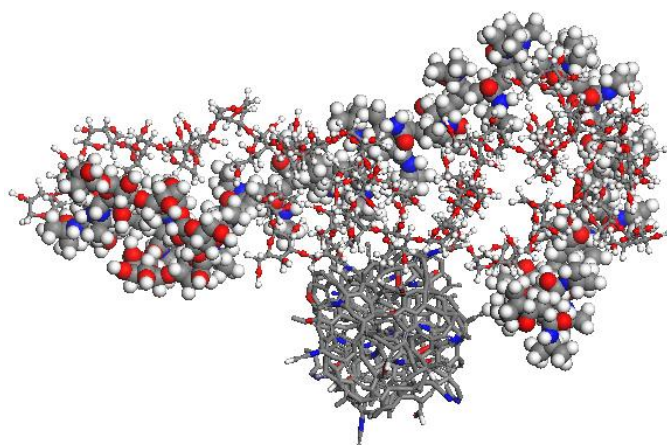

**Figure S1.** Representation of the simulated model: PNP chain is depicted using the CPK model, agarose is illustrated in ball-and-stick representation and the central carbon dot is displayed using a stick. Water molecules are omitted for clarity.

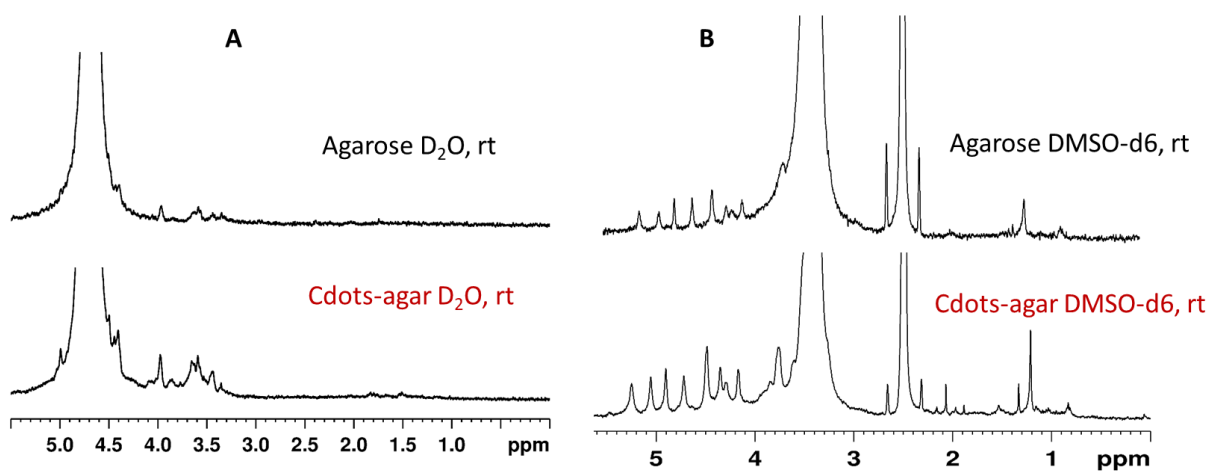

**Figure S2.**  $^1\text{H}$ -NMR spectra (400.13 MHz, 25 °C) of agarose and Cdots-agar in: A)  $\text{D}_2\text{O}$  and B)  $\text{DMSO-}d_6$  at 25 °C.

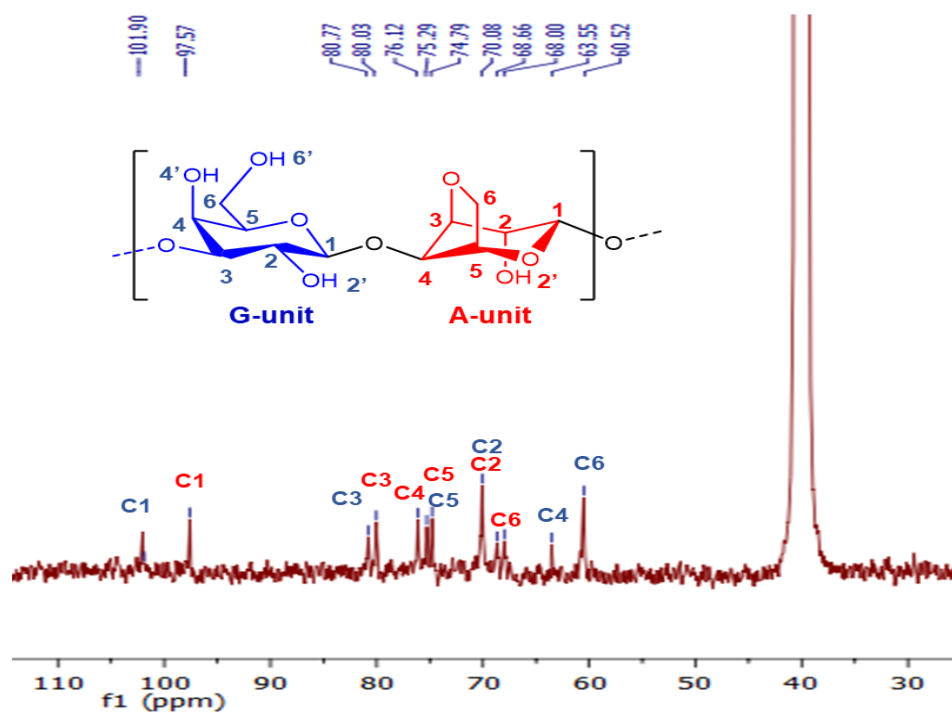

**Figure S3.**  $^{13}\text{C}$ -NMR spectrum of Cdots-agar in  $\text{DMSO-}d_6$  at 37°C (AvanceNEO 400 MHz spectrometer).

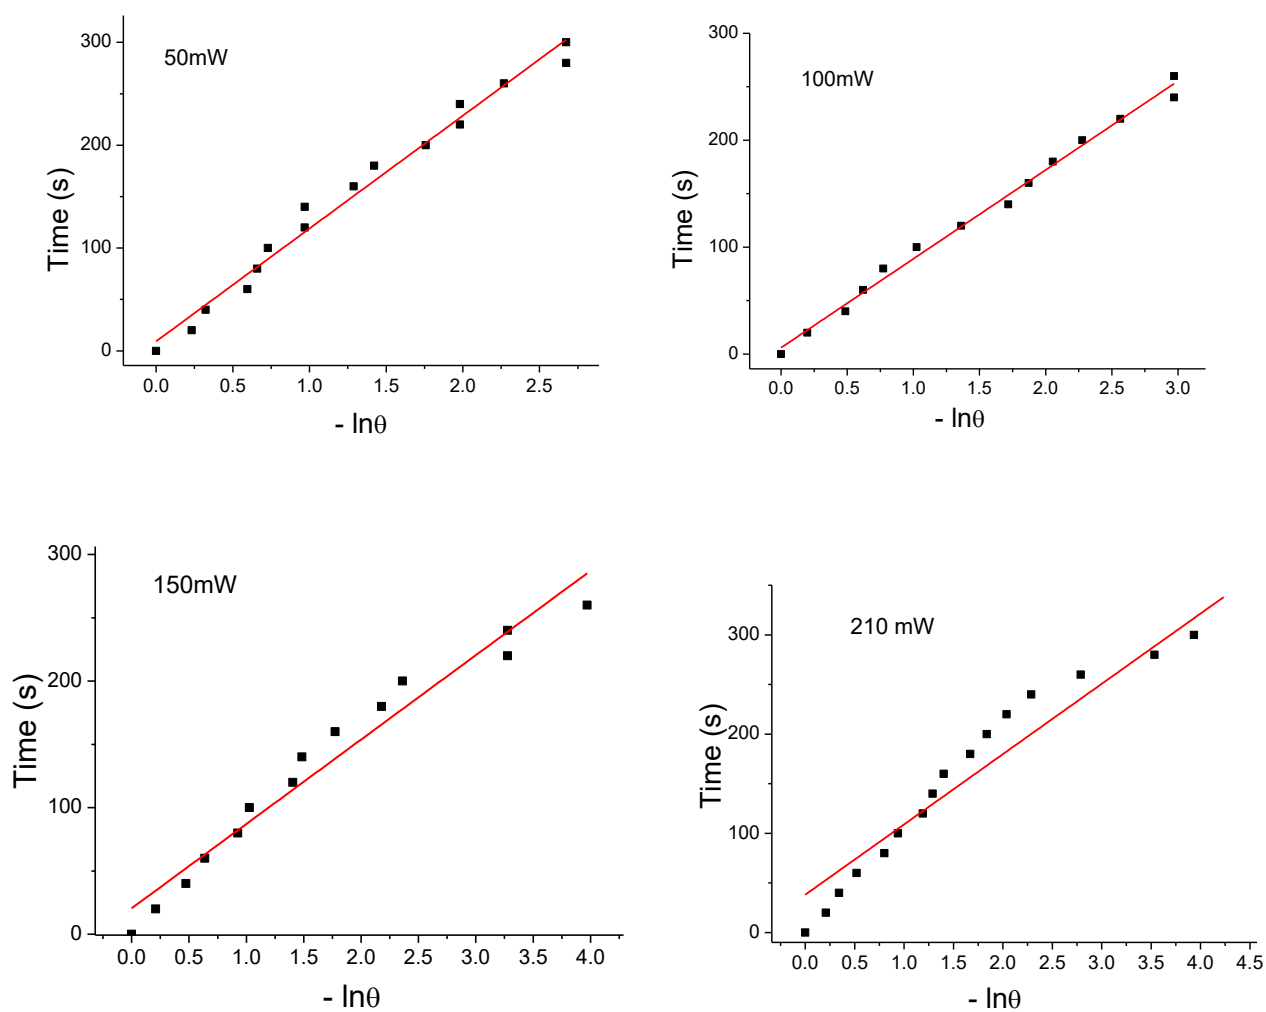

**Figure S4.** Linear relationship between time (sec) and  $-\ln(\theta)$ , the slope is the time constant ( $\tau_s$ ) for different photothermal experiments.

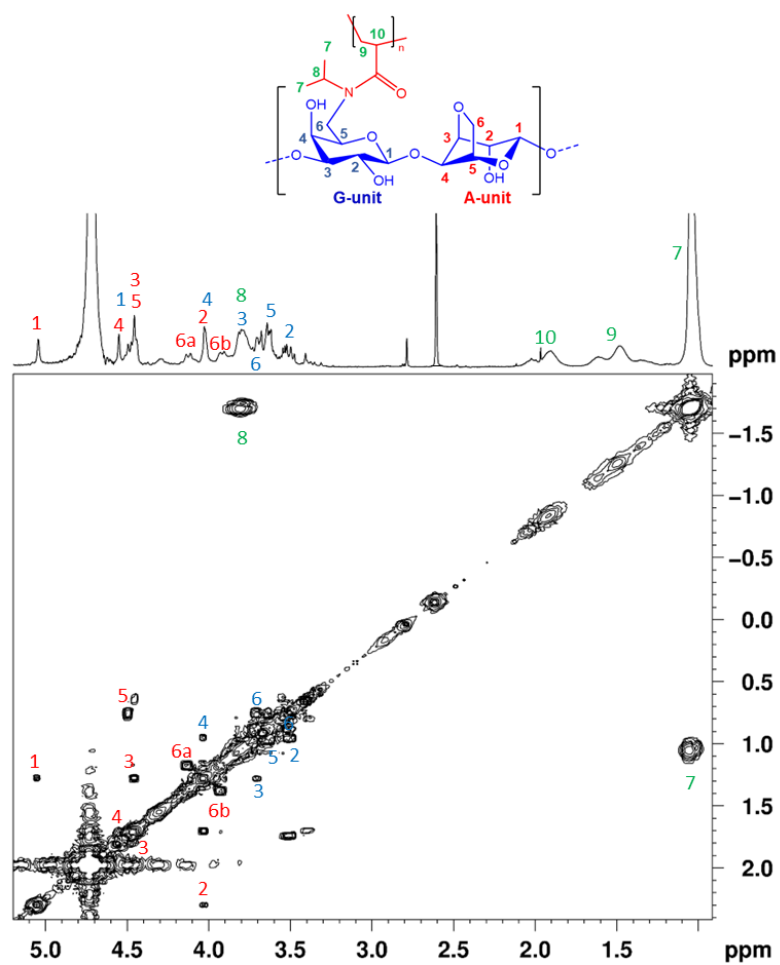

**Figure S5.** 2D-COSY NMR spectrum of Cdots-agar-PNM in D<sub>2</sub>O at 25 °C (Bruker Avance 400<sup>TM</sup>, 400.13 MHz).

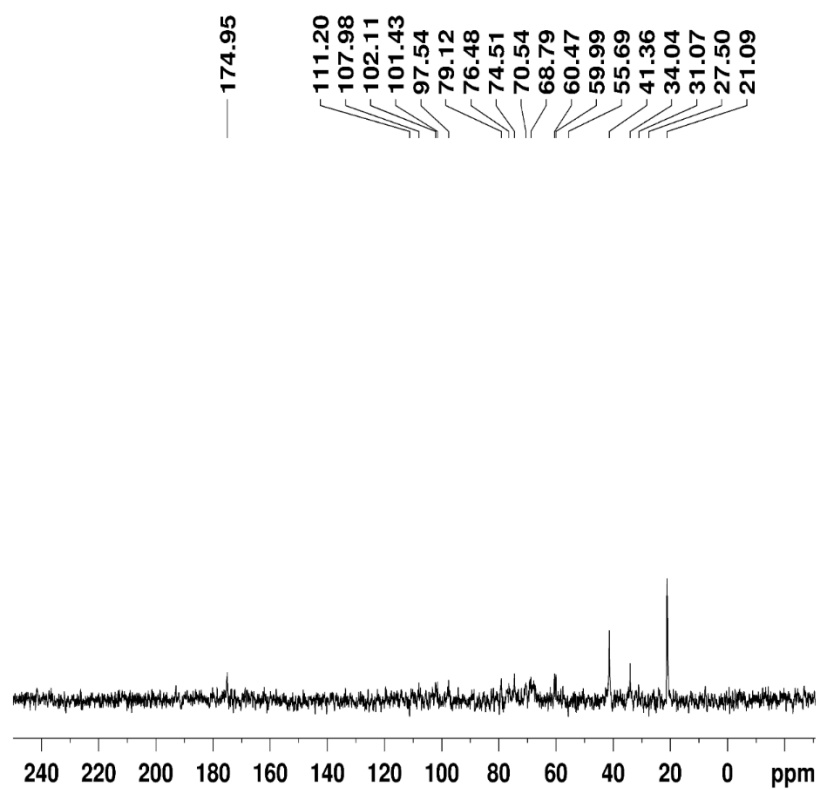

**Figure S6.**  $^{13}\text{C}$ -NMR spectrum of Cdots-agar-PNM in  $\text{D}_2\text{O}$  at 25 °C (Bruker Avance 400<sup>TM</sup> spectrometer).

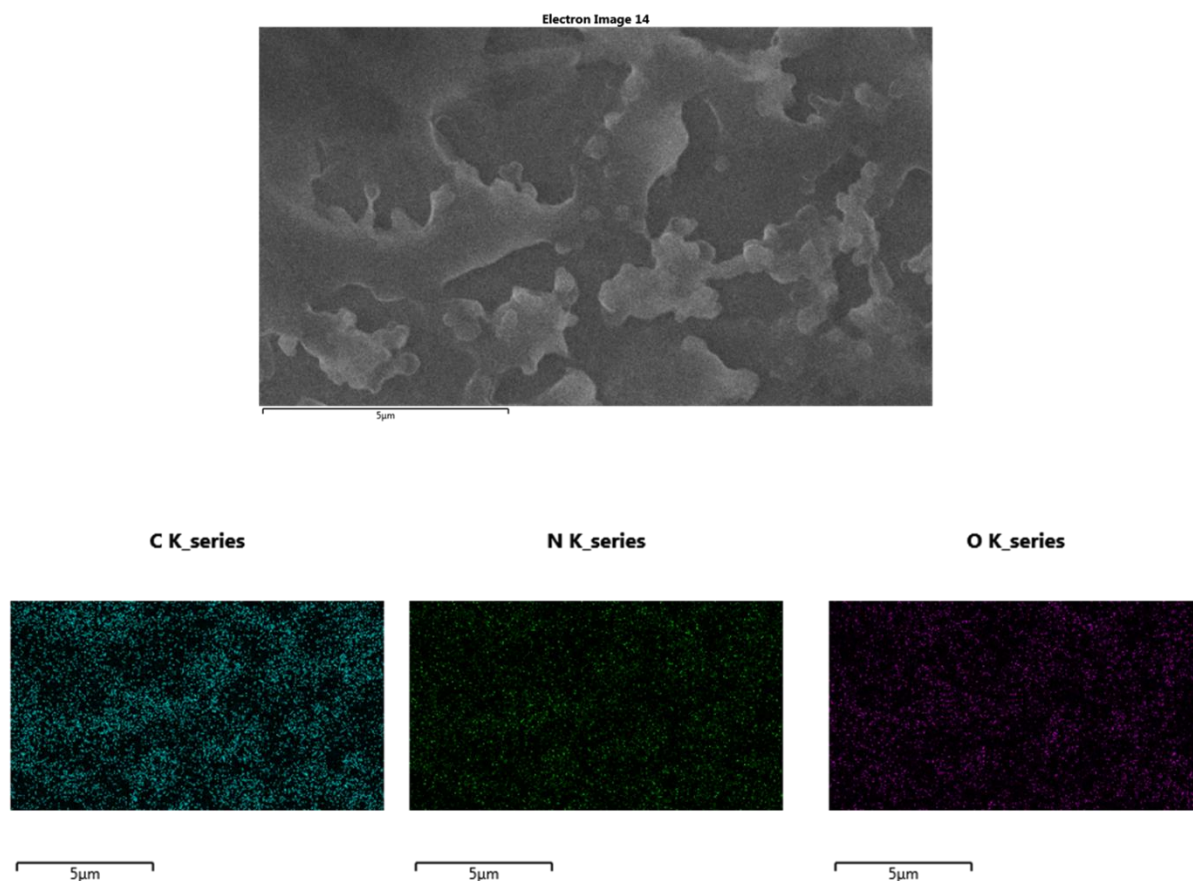

**Figure S7.** EDX-maps for A) CDs-agar-PNM and B) CDs-agar nanostructures on Si substrate

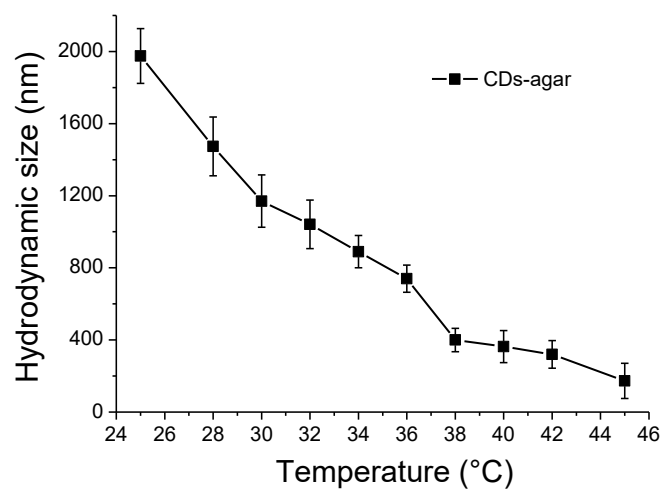

**Figure S8.** CDs-agar: DLS measurements for CDs-agar aqueous dispersion ( $2 \text{ mg mL}^{-1}$ ) at pH 7.0 and at various temperatures: 25, 28, 30, 32, 34, 36, 38, 40, 42 and 45 °C.

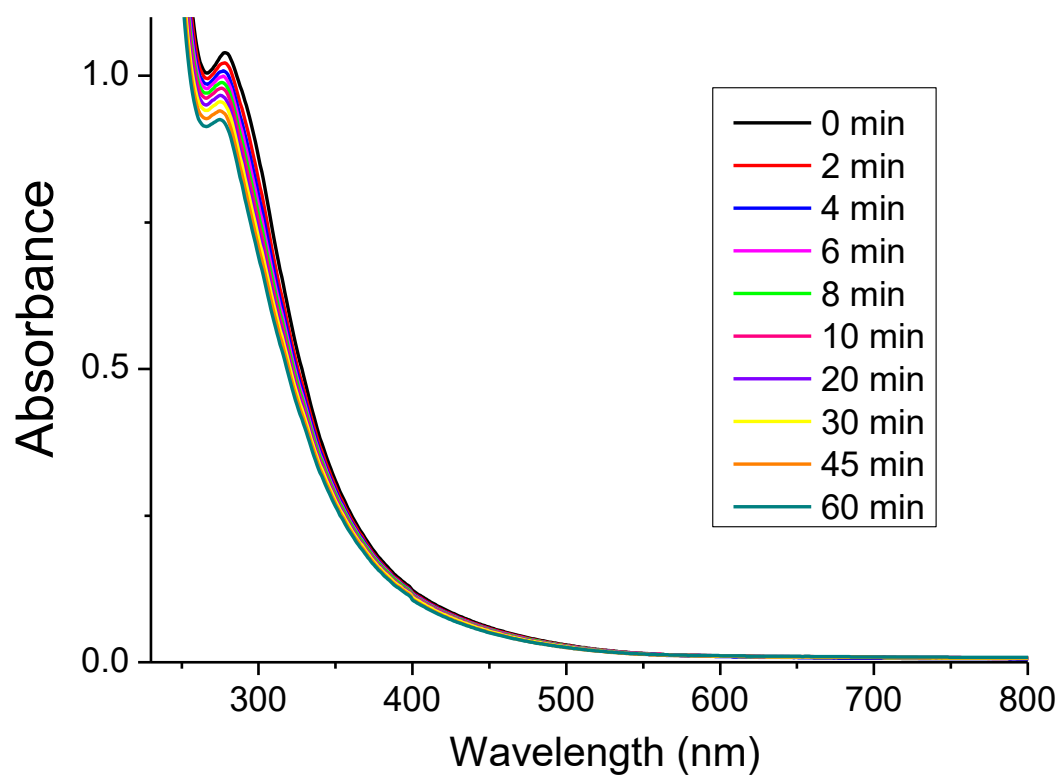

**Figure S9.** optical spectra changes of CDs-agar-PNM/gold precursor dispersion at different time on dark condition.

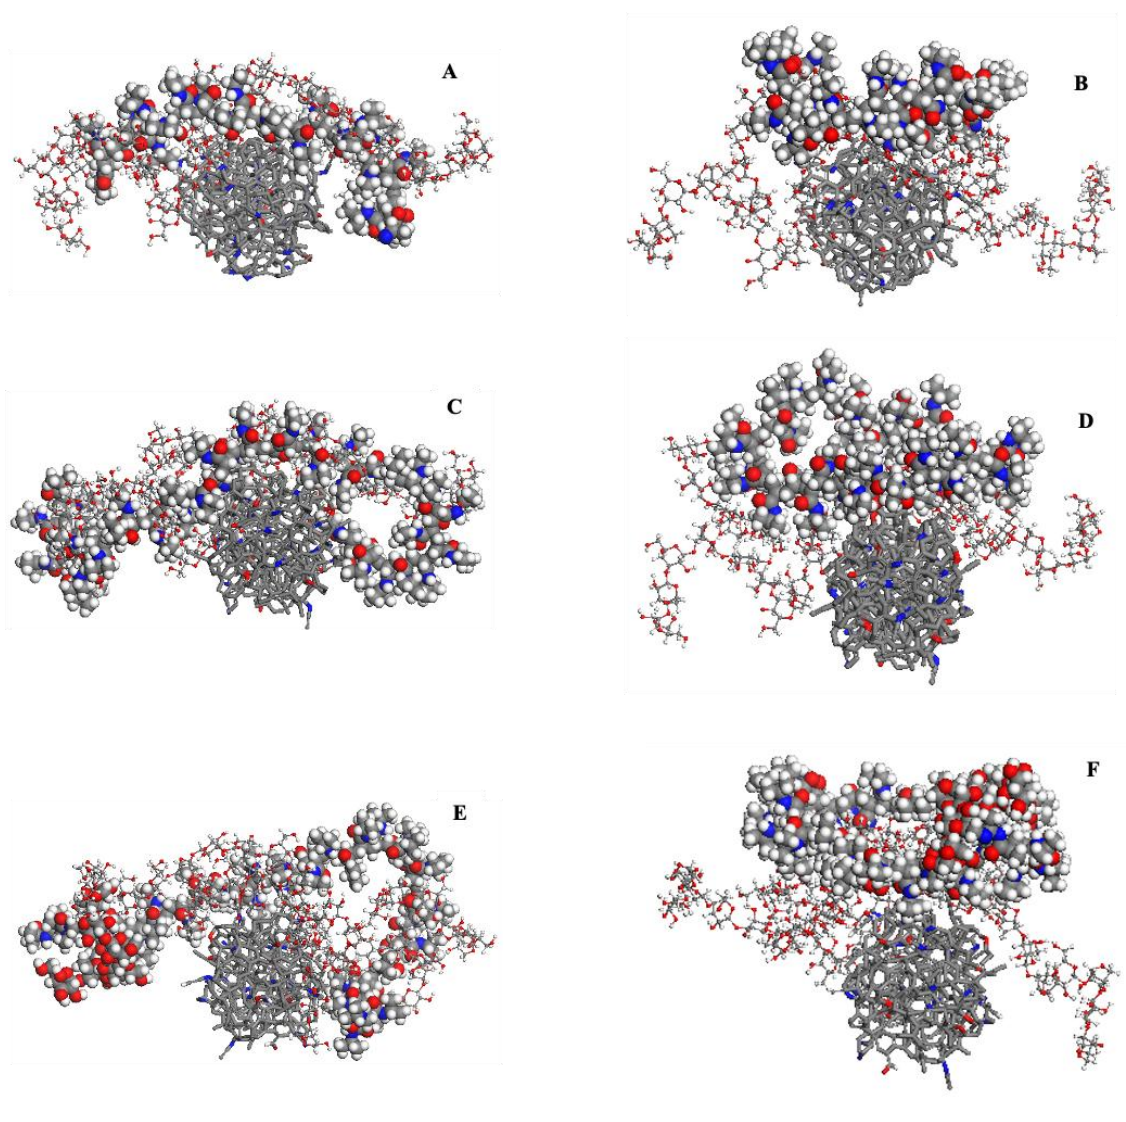



**Figure S10.** Snapshots taken at 70 ns and 160 ns for CDs-agar-PNM-24 (A,B), CDs-agar-PNM-32 (C,D) and CDs-agar-PNM-42 (E,F); PNM chain is depicted using the CPK model, agarose is illustrated in ball-and-stick representation and the central carbon dot is displayed using a stick. Water molecules are omitted for clarity.

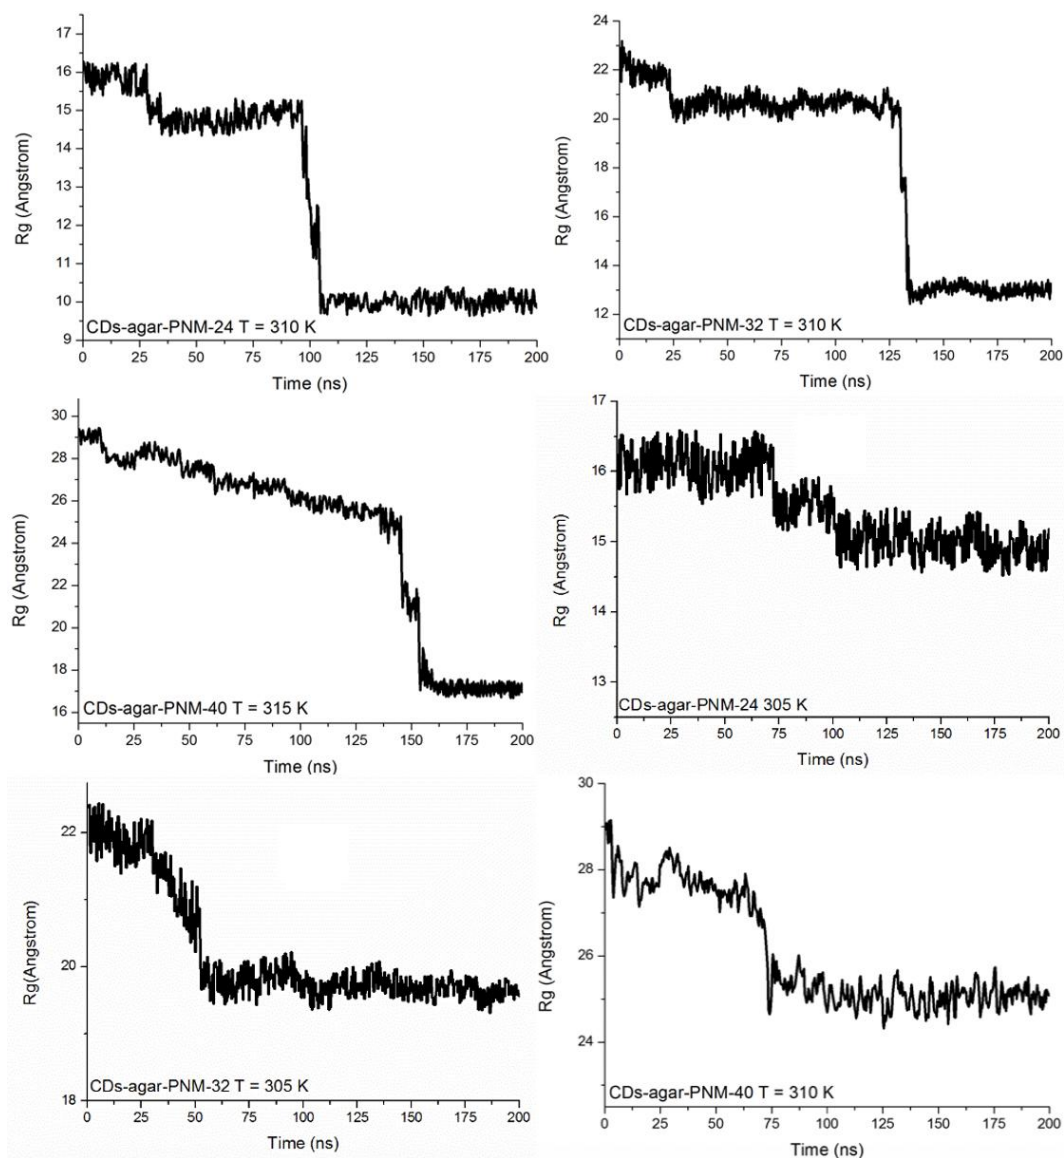

**Figure S11.** Rg trends for the investigated models, at 305, 310 and 315 K.



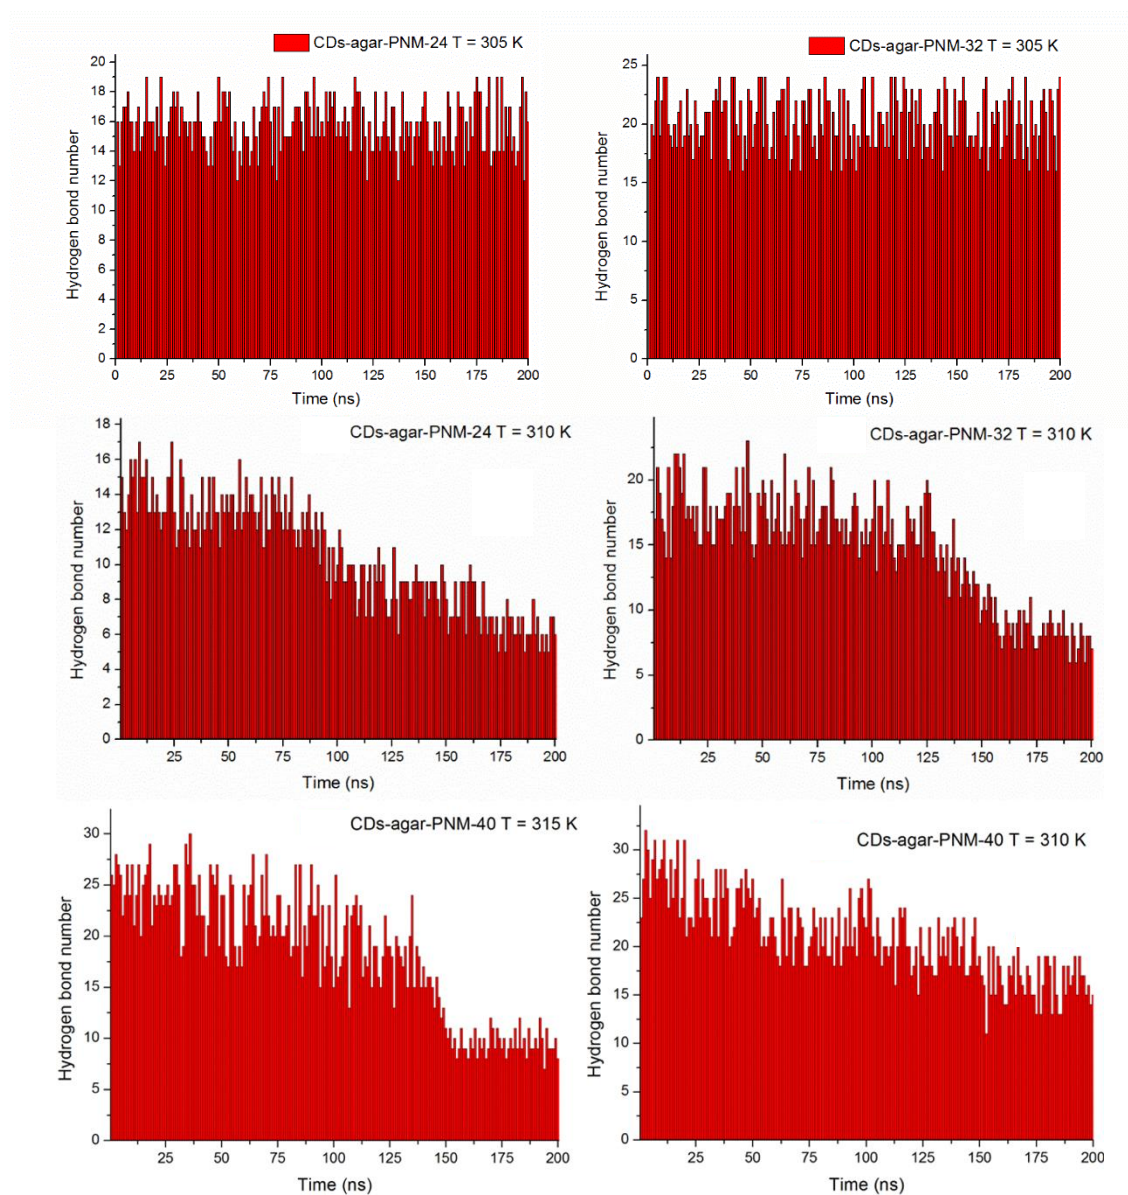

**Figure S12.** Number of hydrogen bonds formed during the simulations at 305, 310 and 315 K.

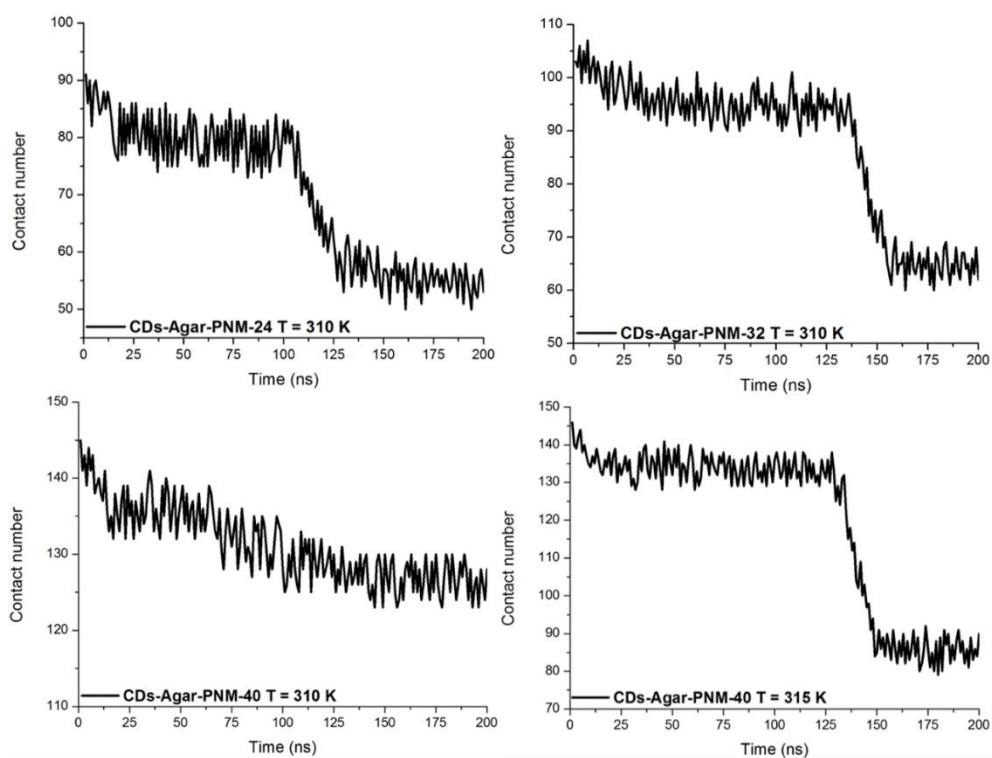

**Figure S13.** Atom contact number between PNM and agarose

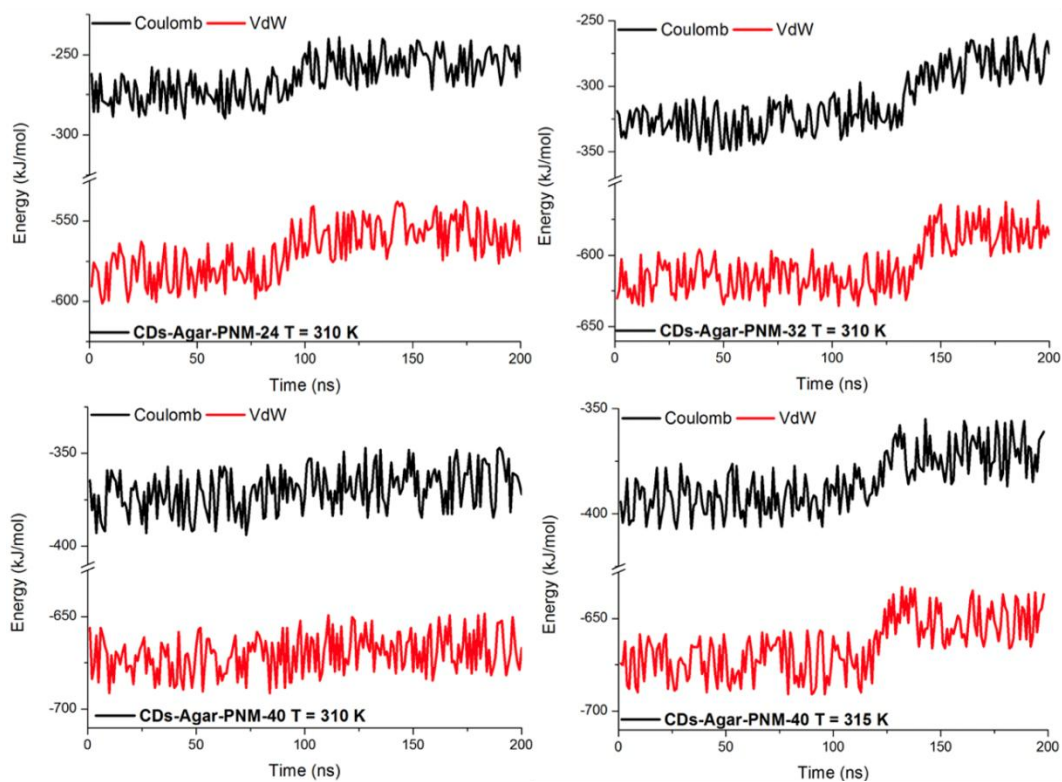

**Figure S14.** Interaction energies between PNM and agarose. VdW and Coulomb indicate van der Waals and Coulomb energies, respectively

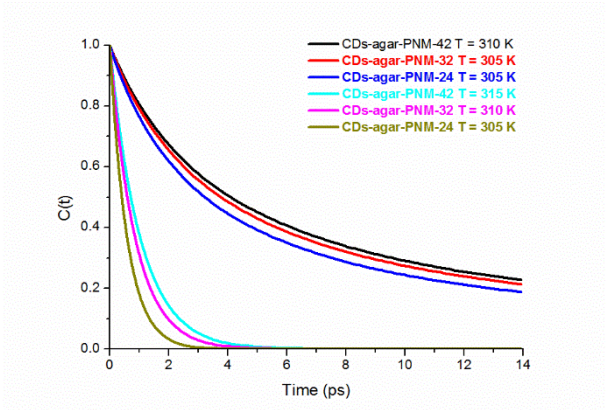

**Figure S15.**  $c(t)$  autocorrelation function for hydrogen bond involving PNM acceptor groups and hydrogen atom donors from the –OH groups on agarose.

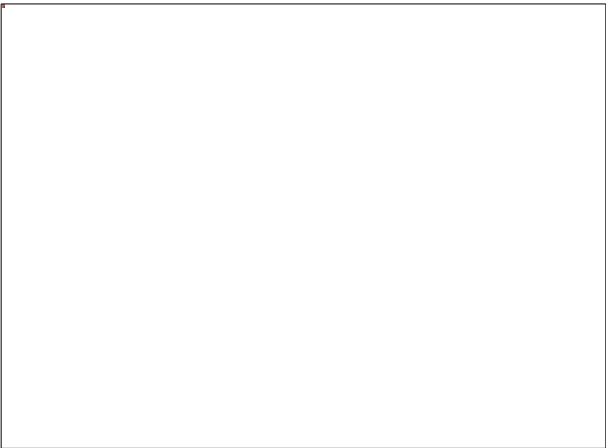

**Table S1.** Cytotoxicity test. Statistical analysis with *Two-stage linear step-up procedure of Benjamini, Krieger and Yekutieli*

| Two-stage linear step-up procedure of Benjamini, Krieger and Yekutieli | Mean Diff, | Discovery? | P Value |
|------------------------------------------------------------------------|------------|------------|---------|
| Untreated vs. 400 ug                                                   | 20,52      | Yes        | <0,0001 |
| Untreated vs. 40 ug                                                    | -0,452     | No         | 0,8291  |
| Untreated vs. 4 ug                                                     | 2,995      | No         | 0,1602  |
| Untreated vs. 0.4 ug                                                   | 4,115      | No         | 0,0577  |
| Untreated vs. 0.04 ug                                                  | 2,259      | No         | 0,2856  |

**Table S2.** Chemical shifts (ppm) of proton and carbon signals for Cdots-agar in DMSO-*d*6 at 70 °C.

|          | <b>H1</b> | <b>H2</b> | <b>H3</b> | <b>H4</b> | <b>H5</b> | <b>H6</b> |
|----------|-----------|-----------|-----------|-----------|-----------|-----------|
| <b>G</b> | 4.32      | 3.45      | 3.55      | 3.84      | 3.44      | 3.54      |
| <b>A</b> | 5.08      | 3.83      | 4.22      | 4.53      | 4.35      | 3.92      |
|          | <b>C1</b> | <b>C2</b> | <b>C3</b> | <b>C4</b> | <b>C5</b> | <b>C6</b> |
| <b>G</b> | 101.9     | 68.66     | 80.77     | 63.55     | 75.92     | 60.52     |
| <b>A</b> | 97.57     | 70.08     | 80.03     | 76.12     | 74.79     | 68.00     |

#### Photothermal conversion efficiency ( $\eta$ ).

Photothermal measurements were performed irradiating a volume of 100  $\mu$ L of CDs-agar-PNM deionized water dispersion in a glass tube (diameter 3 mm), using continuous wave with excitation wavelength 405 nm. A standard infrared thermal imaging camera was used to measure the temperature of solution every 20 seconds, during the heating and cooling processes. The photothermal conversion efficiency ( $\eta$ ) was calculated according to equation (1) introduced by Roper

$$\eta = \frac{hA(T_{max} - T_{surr}) - Q_{Dis}}{I(1 - 10^{-A})} \quad (1)$$

Where  $T_{max}$  and  $T_{surr}$  represents the max photothermal temperature and the ambient temperature respectively,  $I$  is the incident laser power and  $A$  is the absorbance value of Cds-agar-PNM dispersion at the wavelength excitation. The equations (2) and (3) were introduced to calculate the parameter  $hA$ .

$$\theta = \frac{T - T_{surr}}{T_{max} - T_{surr}} \quad (2)$$

$$\tau = \frac{M_D C_D}{hA} \quad (3)$$

where MD and CD are the mass (0.1 g) and heat capacity (4.2 J g<sup>-1</sup>) of water respectively, and  $\tau_s$  is the time constant, calculated by the equation (4).

$$t = -\tau(\ln\theta) \quad (4)$$

**Table S2** Photothermal experiments data of CDs-agar-PNM at different laser power.

| Laser $\lambda$ (nm) | Laser Power (mW) | Abs <sub>exc nm</sub> | $\tau_s$ (s) | $\eta$ (%) | $\eta$ (%)<br>mean $\pm$ std dev   |
|----------------------|------------------|-----------------------|--------------|------------|------------------------------------|
| 405                  | 50               | 0.336                 | 109.7        | 41.2       | <b>38.8 <math>\pm</math> 2.8 %</b> |
|                      | 100              |                       | 83.1         | 36.6       |                                    |
|                      | 150              |                       | 66.6         | 41.3       |                                    |
|                      | 210              |                       | 70.8         | 36.1       |                                    |
